# Supplementary material for: Impaired glymphatic system as evidenced by low diffusivity along perivascular spaces is associated with cerebral small vessel disease: a population-based study
Source: PubMed Central journal article supplement — Stroke Vasc Neurol. 2023 Apr 12;8(5):413–23. doi: 10.1136/svn-2022-002191 (PMC10647865; doi:10.1136/svn-2022-002191), 2023-04-12

**Table S1. The detailed MRI scan parameters in the present study**

| Contrast   | Orientation   | Voxel /mm <sup>3</sup> | Parameters                                                                                                      | Scan time |
|------------|---------------|------------------------|-----------------------------------------------------------------------------------------------------------------|-----------|
| T1w MPRAGE | 3D sagittal   | 1.00×1.00×1.00         | TE=3.0ms, TR=6.7ms, TI=880ms, shot interval=2000ms, Flip angle=8°                                               | 4:30      |
| T2w        | 2D axial      | 0.51×0.51×6.50         | TE=105ms, TR=2500ms, SPIR fat suppression                                                                       | 1:05      |
| SWI        | 3D axial      | 0.63×0.63×0.80         | first TE=7.2ms, echo spacing = 6.2ms, 5 echoes, Flip angle=17°, TR =37ms                                        | 2:20      |
| FLAIR      | 2D axial      | 0.53×0.53×6.50         | TE=110ms, TR=7000ms, TI=2300ms, SPIR fat suppression                                                            | 2:27      |
| DWI        | 2D axial      | 1.20×1.20×6.50         | TE=98ms, TR=2500ms, b=1000s/mm <sup>2</sup> , ADC and eADC calculated online                                    | 0:30      |
| DTI        | 2D transverse | 1.88×1.88×2.50         | TE=90ms, TR=3500ms, b=0 and b=1000s/mm <sup>2</sup> with 32 diffusion encoding directions, SPIR fat suppression | 4:05      |

T1w MPRAGE, T1-weighted magnetization prepared rapid acquisition gradient-echo; T2w, T2-weighted; SWI, susceptibility-weighted imaging; FLAIR, fluid-attenuated inversion recovery; DWI, diffusion weighted imaging; DTI, diffusion tensor imaging; ADC, apparent diffusion coefficient.

**Table S2. Clinical characteristics between participants included or excluded in present analysis**

| Characteristic                    | Included(n=2219)   | Excluded(n=848)       | P value |
|-----------------------------------|--------------------|-----------------------|---------|
| <b>Sociodemographics</b>          |                    |                       |         |
| Age(years), mean±SD               | 61.3±6.6           | 60.8±6.9              | 0.045   |
| Sex(male), n(%)                   | 1019(45.9)         | 408(48.1)             | 0.28    |
| <b>Vascular risk factors</b>      |                    |                       |         |
| BMI(kg/m <sup>2</sup> ) , mean±SD | 24.0±3.0           | 23.3±3.1              | <0.001  |
| SBP(mmHg), median (IQR)           | 129.0(118.0-140.0) | 127.25(116.00-137.50) | 0.004   |
| DBP(mmHg), median (IQR)           | 75.0(69.5-81.0)    | 74.0(68.0-81.0)       | 0.02    |
| Hypertension, n(%)                | 976(44.0)          | 345(40.7)             | 0.10    |
| Diabetes Mellitus, n(%)           | 505(22.8)          | 158(18.6)             | 0.01    |
| Hypercholesterolemia, n(%)        | 494(22.3)          | 122(14.4)             | <0.001  |
| Stroke/TIA, n(%)                  | 67(3.0)            | 31(3.7)               | 0.37    |

|                                      |           |           |        |
|--------------------------------------|-----------|-----------|--------|
| Coronary artery disease, n(%)        | 10(0.5)   | 3(0.4)    | 0.95   |
| Atrial fibrillation, n(%)            | 17(0.8)   | 9(1.1)    | 0.43   |
| Current drinking, n(%)               | 397(17.9) | 177(20.9) | 0.058  |
| Current Smoking, n(%)                | 436(19.7) | 193(22.8) | 0.056  |
| <b>Laboratory data, median (IQR)</b> |           |           |        |
| Total cholesterol (mmol/L)           | 5.4±1.0   | 5.1±1.0   | <0.001 |
| Triglycerides (mmol/L)               | 1.8±1.3   | 1.7±1.2   | <0.001 |
| HDL-C (mmol/L)                       | 1.4±0.3   | 1.3±0.3   | <0.001 |
| LDL -C(mmol/L)                       | 2.8±0.8   | 2.7±0.7   | <0.001 |
| FBG (mmol/L)                         | 6.0±1.6   | 5.8±1.6   | <0.001 |
| HbA1c(%)                             | 6.0±1.0   | 5.9±0.9   | <0.001 |
| HCY (mmol/L)                         | 11.9±6.1  | 12.0±6.6  | 0.53   |
| <b>Medication, n (%)</b>             |           |           |        |

|                                                 |                        |                         |                  |
|-------------------------------------------------|------------------------|-------------------------|------------------|
| Antihypertensive                                | 594(26.8)              | 229(27.0)               | 0.90             |
| Lipid-lowering                                  | 101(4.6)               | 19(2.2)                 | 0.003            |
| Antiplatelet                                    | 68(3.1)                | 12(1.4)                 | 0.01             |
| Anticoagulant                                   | 3(0.1)                 | 1(0.1)                  | 1.00             |
| Antidiabetic                                    | 220(9.9)               | 54(6.4)                 | 0.002            |
| <b>MoCA adjusted by education, median (IQR)</b> | <b>22.0(19.0-25.0)</b> | <b>21.00(18.0-24.0)</b> | <b>&lt;0.001</b> |

IQR, interquartile range; SD, standard deviation; CSVD, cerebral small vessel disease; BMI, body mass index; SBP, systolic blood pressure; DBP, diastolic blood pressure; TIA, transient ischaemic attack; HDL-C, high-density lipoprotein; LDL-C, low-density lipoprotein; FBG, fasting blood glucose; HbA1C, glycosylated hemoglobin; HCY, homocysteine; MoCA, Montreal Cognitive Assessment.

**Table S3. Clinical characteristics among all participants with or without present CSVD**

| Characteristic                   | The CSVD score (Wardlaw)* |                    |         | Modified CSVD score (Rothwell)† |                    |         |
|----------------------------------|---------------------------|--------------------|---------|---------------------------------|--------------------|---------|
|                                  | Absent(n=1540)            | Present(n=679)     | P value | Absent(n=1293)                  | Present(n=926)     | P value |
| <b>Sociodemographics</b>         |                           |                    |         |                                 |                    |         |
| Age(years), mean±SD              | 59.9±6.0                  | 64.6±6.7           | <0.001  | 59.7±6.0                        | 63.7±6.7           | <0.001  |
| Sex(male), n(%)                  | 671(43.6)                 | 348(51.3)          | <0.001  | 580(44.9)                       | 439(47.4)          | 0.23    |
| <b>Vascular risk factors</b>     |                           |                    |         |                                 |                    |         |
| BMI(kg/m <sup>2</sup> ), mean±SD | 23.9±3.0                  | 24.1±3.1           | 0.15    | 23.9±3.0                        | 24.1±3.1           | 0.11    |
| SBP(mmHg), median (IQR)          | 127.0(116.5-137.5)        | 133.5(123.0-144.0) | <0.001  | 126.5(116.0-137.0)              | 132.0(122.0-143.0) | <0.001  |
| DBP(mmHg), median (IQR)          | 74.5(69.0-80.5)           | 76.0(70.5-82.5)    | <0.001  | 74.5(69.0-80.5)                 | 76.0(70.5-82.0)    | <0.001  |
| Hypertension, n(%)               | 574(37.3)                 | 402(59.2)          | <0.001  | 459(35.5)                       | 517(55.8)          | <0.001  |
| Diabetes Mellitus, n(%)          | 311(20.2)                 | 194(28.6)          | <0.001  | 251(19.4)                       | 254(27.4)          | <0.001  |

|                                    |                 |                 |        |                 |                 |        |
|------------------------------------|-----------------|-----------------|--------|-----------------|-----------------|--------|
| Hypercholesterolemia, n(%)         | 334(21.7)       | 160(23.6)       | 0.33   | 292(22.6)       | 202(21.8)       | 0.67   |
| Stroke/TIA, n(%)                   | 26(1.7)         | 41(6.0)         | <0.001 | 22(1.7)         | 45(4.9)         | <0.001 |
| Coronary artery disease, n(%)      | 8(0.5)          | 2(0.3)          | 0.70   | 9(0.7)          | 1(0.1)          | 0.09   |
| Atrial fibrillation, n(%)          | 9(0.6)          | 8(1.2)          | 0.14   | 8(0.6)          | 9(1.0)          | 0.35   |
| Current drinking, n(%)             | 262(17.0)       | 135(19.9)       | 0.10   | 220(17.0)       | 177(19.1)       | 0.20   |
| Current Smoking, n(%)              | 307(19.9)       | 129(19.0)       | 0.61   | 267(20.7)       | 169(18.3)       | 0.16   |
| <b>Medication, n (%)</b>           |                 |                 |        |                 |                 |        |
| Antihypertensive                   | 328(21.3)       | 266(39.2)       | <0.001 | 257(19.9)       | 337(36.4)       | <0.001 |
| Lipid-lowering                     | 57(3.7)         | 44(6.5)         | 0.004  | 46(3.6)         | 55(5.9)         | 0.008  |
| Antiplatelet                       | 35(2.3)         | 33(4.9)         | 0.001  | 25(1.9)         | 43(4.6)         | <0.001 |
| Anticoagulant                      | 0(0.0)          | 3(0.4)          | 0.03   | 0(0.0)          | 3(0.3)          | 0.14   |
| Antidiabetic                       | 129(8.4)        | 91(13.4)        | <0.001 | 103(8.0)        | 117(12.6)       | <0.001 |
| <b>MoCA adjusted by education,</b> | 23.0(19.0-25.0) | 22.0(18.0-25.0) | 0.001  | 23.0(19.0-26.0) | 22.0(18.0-25.0) | <0.001 |

**median (IQR)**

---

IQR, interquartile range; SD, standard deviation; CSVD, cerebral small vessel disease; BMI, body mass index; SBP, systolic blood pressure; DBP, diastolic blood pressure; TIA, transient ischaemic attack; HDL-C, high-density lipoprotein; LDL-C, low-density lipoprotein; FBG, fasting blood glucose; HbA1C, glycosylated hemoglobin; HCY, homocysteine; MoCA, Montreal Cognitive Assessment; WMH, white matter hyperintensities; BG-EPVS, enlarged perivascular space in basal ganglia; CMBs, cerebral microbleeds.

\*The CSVD score (Wardlaw's scale; from 0 to 4 scores): 1 point allocated for WMH burden (periventricular WMH Fazekas 3 or deep WMH Fazekas 2–3), moderate-to-severe (>10) BG-EPVS and presence of lacunes and CMBs.

†Modified CSVD score (Rothwell's scale; from 0 to 6 scores): 1 point allocated for presence of lacunes, 1–4 CMBs, frequent-to-severe (>20) BG-EPVS, modified WMH burden Grade 1 (total periventricular + subcortical WMH Fazekas 3–4), 2 points allocated for  $\geq 5$  CMBs and modified WMH burden Grade 2 (total periventricular + subcortical WMH Fazekas 5–6).

**STable 4. Logistic regression analyses for the associations between the DTI-ALPS index and presence and severity of CSVD**

| Variables                                    | Model 1         |         | Model 2         |         | Model 3         |         |
|----------------------------------------------|-----------------|---------|-----------------|---------|-----------------|---------|
|                                              | OR/cOR(95% CI)  | P value | OR/cOR(95% CI)  | P value | OR/cOR(95% CI)  | P value |
| <b>Presence of CSVD(Wardlaw*)</b>            |                 |         |                 |         |                 |         |
| Continuous (per 1-SD decrement)              | 1.31(1.18-1.45) | <0.001  | 1.27(1.14-1.41) | <0.001  | 1.27(1.14-1.41) | <0.001  |
| Q4 ( $\geq 1.76$ )                           | Ref.            |         | Ref.            |         | Ref.            |         |
| Q3 (1.66-1.75)                               | 1.11(0.83-1.48) | 0.49    | 1.12(0.84-1.50) | 0.44    | 1.10(0.82-1.47) | 0.54    |
| Q2 (1.57-1.65)                               | 1.22(0.91-1.63) | 0.18    | 1.22(0.91-1.64) | 0.19    | 1.20(0.89-1.61) | 0.23    |
| Q1 (<1.57)                                   | 1.87(1.41-2.47) | <0.001  | 1.79(1.34-2.38) | <0.001  | 1.77(1.33-2.35) | <0.001  |
| <b>Modified presence of CSVD (Rothwell†)</b> |                 |         |                 |         |                 |         |
| Continuous (per 1-SD decrement)              | 1.32(1.20-1.45) | <0.001  | 1.28(1.16-1.41) | <0.001  | 1.27(1.16-1.41) | <0.001  |
| Q4 ( $\geq 1.76$ )                           | Ref.            |         | Ref.            |         | Ref.            |         |
| Q3 (1.66-1.75)                               | 0.95(0.74-1.23) | 0.70    | 0.96(0.74-1.24) | 0.75    | 0.94(0.72-1.22) | 0.64    |



|                                                  |                 |        |                 |        |                 |        |
|--------------------------------------------------|-----------------|--------|-----------------|--------|-----------------|--------|
| Q2 (1.57-1.65)                                   | 1.08(0.84-1.40) | 0.55   | 1.08(0.83-1.40) | 0.59   | 1.06(0.81-1.38) | 0.67   |
| Q1 (<1.57)                                       | 1.92(1.48-2.48) | <0.001 | 1.82(1.40-2.36) | <0.001 | 1.80(1.38-2.34) | <0.001 |
| <b>Total burden of CSVD (Wardlaw*)</b>           |                 |        |                 |        |                 |        |
| Continuous (per 1-SD decrement)                  | 1.39(1.26-1.54) | <0.001 | 1.35(1.22-1.49) | <0.001 | 1.34(1.21-1.49) | <0.001 |
| Q4 ( $\geq$ 1.76)                                | Ref.            |        | Ref.            |        | Ref.            |        |
| Q3 (1.66-1.75)                                   | 1.08(0.81-1.44) | 0.59   | 1.10(0.83-1.47) | 0.50   | 1.08(0.81-1.44) | 0.60   |
| Q2 (1.57-1.65)                                   | 1.20(0.90-1.59) | 0.22   | 1.21(0.90-1.61) | 0.20   | 1.18(0.88-1.58) | 0.26   |
| Q1 (<1.57)                                       | 2.01(1.53-2.65) | <0.001 | 1.91(1.45-2.53) | <0.001 | 1.89(1.43-2.49) | <0.001 |
| <b>Modified total burden of CSVD (Rothwell†)</b> |                 |        |                 |        |                 |        |
| Continuous (per 1-SD decrement)                  | 1.40(1.28-1.53) | <0.001 | 1.36(1.24-1.49) | <0.001 | 1.35(1.23-1.48) | <0.001 |
| Q4 ( $\geq$ 1.76)                                | Ref.            |        | Ref.            |        | Ref.            |        |
| Q3 (1.66-1.75)                                   | 0.96(0.75-1.23) | 0.75   | 0.97(0.76-1.26) | 0.84   | 0.96(0.74-1.23) | 0.73   |
| Q2 (1.57-1.65)                                   | 1.09(0.85-1.40) | 0.51   | 1.09(0.85-1.41) | 0.50   | 1.07(0.83-1.39) | 0.59   |

|            |                 |        |                 |        |                 |        |
|------------|-----------------|--------|-----------------|--------|-----------------|--------|
| Q1 (<1.57) | 2.09(1.63-2.67) | <0.001 | 1.98(1.54-2.55) | <0.001 | 1.95(1.51-2.50) | <0.001 |
|------------|-----------------|--------|-----------------|--------|-----------------|--------|

OR, odds ratio; cOR, common OR CI, confidence interval; DTI-ALPS, diffusion tensor imaging analysis along the perivascular spaces; CSVD, cerebral small vessel disease; BMI, body mass index; TIA, transient ischaemic attack; WMH, white matter hyperintensities; BG-EPVS, enlarged perivascular space in basal ganglia; CMBs, cerebral microbleeds.

Model 1: adjusted for age and sex;

Model 2: adjusted for age, sex, BMI, stroke/TIA, hypertension, diabetes mellitus, hypercholesterolemia, coronary artery disease, atrial fibrillation, current drinker, and current smoker;

Model 3: adjusted for age, sex, BMI, stroke/TIA, hypertension, diabetes mellitus, hypercholesterolemia, coronary artery disease, atrial fibrillation, current drinker, current smoker, antihypertensive medication, lipid-lowering medication, antiplatelet medication, anticoagulant medication, and antidiabetic medication.

\*The CSVD score (Wardlaw's scale; from 0 to 4 scores): 1 point allocated for WMH burden (periventricular WMH Fazekas 3 or deep WMH Fazekas 2–3), moderate-to-severe (>10) BG-EPVS and presence of lacunes and CMBs.

†Modified CSVD score (Rothwell's scale; from 0 to 6 scores): 1 point allocated for presence of lacunes, 1–4 CMBs, frequent-to-severe (>20)

BG-EPVS, modified WMH burden Grade 1 (total periventricular + subcortical WMH Fazekas 3–4), 2 points allocated for  $\geq 5$  CMBs and modified WMH burden Grade 2 (total periventricular + subcortical WMH Fazekas 5–6).

As total CSVD burden and modified total CSVD burden were ordinal categorical variables, ordinal logistic regression model was used and cORs were presented, whereas logistic regression analysis was used and ORs were presented for presence and modified presence of CSVD.

**Table S5. Logistic regression analyses for the associations between the DTI-ALPS index and individual neuroimaging markers of CSVD**

| Variables                       | Model 1         |         | Model 2         |         | Model 3         |         |
|---------------------------------|-----------------|---------|-----------------|---------|-----------------|---------|
|                                 | OR/cOR(95% CI)  | P value | OR/cOR(95% CI)  | P value | OR/cOR(95% CI)  | P value |
| <b>WMH burden</b>               |                 |         |                 |         |                 |         |
| Continuous (per 1-SD decrement) | 1.45(1.28-1.65) | <0.001  | 1.40(1.23-1.59) | <0.001  | 1.41(1.24-1.61) | <0.001  |
| Q4 ( $\geq 1.76$ )              | Ref.            |         | Ref.            |         | Ref.            |         |
| Q3 (1.66-1.75)                  | 1.09(0.75-1.60) | 0.65    | 1.14(0.77-1.68) | 0.52    | 1.13(0.77-1.67) | 0.53    |
| Q2 (1.57-1.65)                  | 1.43(0.99-2.07) | 0.059   | 1.47(1.01-2.15) | 0.04    | 1.45(1.00-2.12) | 0.053   |
| Q1 (<1.57)                      | 2.25(1.58-3.19) | <0.001  | 2.15(1.50-3.08) | <0.001  | 2.16(1.51-3.10) | <0.001  |
| <b>Modified WMH burden</b>      |                 |         |                 |         |                 |         |
| Continuous (per 1-SD decrement) | 1.43(1.30-1.58) | <0.001  | 1.39(1.26-1.54) | <0.001  | 1.39(1.26-1.54) | <0.001  |
| Q4 ( $\geq 1.76$ )              | Ref.            |         | Ref.            |         | Ref.            |         |
| Q3 (1.66-1.75)                  | 1.06(0.80-1.39) | 0.70    | 1.08(0.82-1.43) | 0.57    | 1.22(0.92-1.61) | 0.17    |

|                                    |                 |        |                 |        |                 |        |
|------------------------------------|-----------------|--------|-----------------|--------|-----------------|--------|
| Q2 (1.57-1.65)                     | 1.23(0.93-1.61) | 0.14   | 1.24(0.94-1.64) | 0.13   | 1.22(0.92-1.61) | 0.17   |
| Q1 (<1.57)                         | 2.27(1.74-2.96) | <0.001 | 2.16(1.65-2.83) | <0.001 | 2.14(1.63-2.80) | <0.001 |
| <b>Presence of lacunes</b>         |                 |        |                 |        |                 |        |
| Continuous (per 1-SD decrement)    | 2.03(1.62-2.54) | <0.001 | 1.86(1.48-2.33) | <0.001 | 1.91(1.52-2.41) | <0.001 |
| Q4 ( $\geq$ 1.76)                  | Ref.            |        | Ref.            |        | Ref.            |        |
| Q3 (1.66-1.75)                     | 0.77(0.35-1.72) | 0.53   | 0.82(0.37-1.84) | 0.63   | 0.80(0.35-1.79) | 0.58   |
| Q2 (1.57-1.65)                     | 1.74(0.88-3.44) | 0.11   | 1.72(0.86-3.44) | 0.13   | 1.68(0.84-3.38) | 0.14   |
| Q1 (<1.57)                         | 3.27(1.74-6.14) | <0.001 | 2.95(1.55-5.61) | <0.001 | 2.90(1.52-5.55) | 0.001  |
| <b>BG-EPVS(moderate-to-severe)</b> |                 |        |                 |        |                 |        |
| Continuous (per 1-SD decrement)    | 1.49(1.26-1.77) | <0.001 | 1.42(1.20-1.69) | <0.001 | 1.45(1.21-1.73) | <0.001 |
| Q4 ( $\geq$ 1.76)                  | Ref.            |        | Ref.            |        | Ref.            |        |
| Q3 (1.66-1.75)                     | 1.63(0.91-2.90) | 0.10   | 1.70(0.95-3.05) | 0.07   | 1.62(0.90-2.91) | 0.11   |
| Q2 (1.57-1.65)                     | 1.95(1.11-3.41) | 0.02   | 1.99(1.13-3.50) | 0.02   | 1.87(1.06-3.31) | 0.03   |

|                                     |                 |        |                 |       |                 |       |
|-------------------------------------|-----------------|--------|-----------------|-------|-----------------|-------|
| Q1 (<1.57)                          | 2.61(1.53-4.46) | <0.001 | 2.44(1.42-4.19) | 0.001 | 2.42(1.41-4.17) | 0.001 |
| <b>CSO-EPVS(moderate-to-severe)</b> |                 |        |                 |       |                 |       |
| Continuous (per 1-SD decrement)     | 0.99(0.91-1.08) | 0.85   | 0.97(0.89-1.07) | 0.55  | 0.97(0.89-1.06) | 0.53  |
| Q4 ( $\geq$ 1.76)                   | Ref.            |        | Ref.            |       | Ref.            |       |
| Q3 (1.66-1.75)                      | 0.95(0.74-1.22) | 0.70   | 0.96(0.75-1.23) | 0.76  | 0.96(0.75-1.23) | 0.74  |
| Q2 (1.57-1.65)                      | 1.07(0.83-1.37) | 0.62   | 1.07(0.83-1.38) | 0.59  | 1.06(0.82-1.37) | 0.63  |
| Q1 (<1.57)                          | 0.87(0.67-1.12) | 0.27   | 0.83(0.64-1.07) | 0.15  | 0.83(0.64-1.07) | 0.15  |
| <b>Presence of CMBs</b>             |                 |        |                 |       |                 |       |
| Continuous (per 1-SD decrement)     | 1.11(0.96-1.28) | 0.14   | 1.08(0.93-1.24) | 0.31  | 1.05(0.91-1.22) | 0.49  |
| Q4 ( $\geq$ 1.76)                   | Ref.            |        | Ref.            |       | Ref.            |       |
| Q3 (1.66-1.75)                      | 0.83(0.56-1.23) | 0.35   | 0.82(0.55-1.21) | 0.31  | 0.79(0.53-1.18) | 0.26  |
| Q2 (1.57-1.65)                      | 0.66(0.44-1.00) | 0.050  | 0.63(0.42-0.97) | 0.03  | 0.62(0.40-0.94) | 0.02  |
| Q1 (<1.57)                          | 1.11(0.77-1.61) | 0.58   | 1.05(0.72-1.54) | 0.80  | 1.00(0.68-1.47) | 1.00  |

**CMBs burden**

|                                 |                 |       |                 |      |                 |      |
|---------------------------------|-----------------|-------|-----------------|------|-----------------|------|
| Continuous (per 1-SD decrement) | 1.12(0.98-1.29) | 0.11  | 1.09(0.95-1.26) | 0.23 | 1.06(0.92-1.23) | 0.40 |
| Q4 ( $\geq 1.76$ )              | Ref.            |       | Ref.            |      | Ref.            |      |
| Q3 (1.66-1.75)                  | 0.84(0.57-1.24) | 0.39  | 0.83(0.56-1.23) | 0.34 | 0.81(0.54-1.20) | 0.29 |
| Q2 (1.57-1.65)                  | 0.66(0.44-1.00) | 0.053 | 0.64(0.42-0.97) | 0.03 | 0.62(0.40-0.94) | 0.03 |
| Q1 (<1.57)                      | 1.14(0.78-1.65) | 0.50  | 1.08(0.74-1.57) | 0.70 | 1.03(0.70-1.50) | 0.89 |

**Brain atrophy(GCA scale 2-3)**

|                                 |                 |        |                 |       |                 |       |
|---------------------------------|-----------------|--------|-----------------|-------|-----------------|-------|
| Continuous (per 1-SD decrement) | 1.33(1.13-1.57) | <0.001 | 1.28(1.08-1.52) | 0.004 | 1.29(1.09-1.53) | 0.003 |
| Q4 ( $\geq 1.76$ )              | Ref.            |        | Ref.            |       | Ref.            |       |
| Q3 (1.66-1.75)                  | 1.19(0.70-2.03) | 0.51   | 1.21(0.71-2.07) | 0.48  | 1.28(0.74-2.19) | 0.38  |
| Q2 (1.57-1.65)                  | 1.42(0.85-2.37) | 0.18   | 1.41(0.84-2.35) | 0.19  | 1.46(0.87-2.46) | 0.15  |
| Q1 (<1.57)                      | 1.73(1.06-2.81) | 0.03   | 1.64(1.00-2.68) | 0.049 | 1.67(1.01-2.74) | 0.04  |

OR, odds ratio; cOR, common OR CI, confidence interval; DTI-ALPS, diffusion tensor imaging analysis along the perivascular spaces; CSVD,

cerebral small vessel disease; BMI, body mass index; TIA, transient ischaemic attack; WMH, white matter hyperintensities; EPVS, enlarged perivascular space; BG-EPVS, basal ganglia-EPVS; CSO-EPVS, centrum semiovale-EPVS; CMBs, cerebral microbleeds; GCA, global cortical atrophy scale.

Model 1: adjusted for age and sex;

Model 2: adjusted for age, sex, BMI, stroke/TIA, hypertension, diabetes mellitus, hypercholesterolemia, coronary artery disease, atrial fibrillation, current drinker, and current smoker;

Model 3: adjusted for age, sex, BMI, stroke/TIA, hypertension, diabetes mellitus, hypercholesterolemia, coronary artery disease, atrial fibrillation, current drinker, current smoker, antihypertensive medication, lipid-lowering medication, antiplatelet medication, anticoagulant medication, and antidiabetic medication.

As Modified WMH Burden and CMBs Burden were ordinal categorical variables, ordinal logistic regression model was used and cORs were presented, whereas logistic regression analysis was used and ORs were presented for others.



**Table S6. Linear regression analyses for the association between the DTI-ALPS index and cognitive function in individuals with CSVD**

|         | Presence of CSVD (Wardlaw*, n=679) |         | Presence of CSVD (Rothwell†, n=926) |         |
|---------|------------------------------------|---------|-------------------------------------|---------|
|         | $\beta$ (95%CI)                    | P value | $\beta$ (95%CI)                     | P value |
| Model 1 | 5.20(2.95, 7.44)                   | <0.001  | 4.09(2.18, 6.00)                    | <0.001  |
| Model 2 | 4.89(2.61, 7.16)                   | <0.001  | 3.82(1.90, 5.74)                    | <0.001  |
| Model 3 | 4.95(2.67, 7.23)                   | <0.001  | 3.83(1.90, 5.76)                    | <0.001  |
| Model 4 | 4.78(2.46, 7.09)                   | <0.001  | 3.68(1.72, 5.64)                    | <0.001  |

Model 1: adjusted for age, sex, and education;

Model 2: adjusted for age, sex, BMI, stroke/TIA, hypertension, diabetes mellitus, hypercholesterolemia, coronary artery disease, atrial fibrillation, current drinker, current smoker, and education;

Model 3: adjusted for age, sex, BMI, stroke/TIA, hypertension, diabetes mellitus, hypercholesterolemia, coronary artery disease, atrial fibrillation, current drinker, current smoker, antihypertensive medication, lipid-lowering medication, antiplatelet medication, anticoagulant medication, antidiabetic medication, and education.

Model 4: adjusted for age, sex, BMI, stroke/TIA, hypertension, diabetes mellitus, hypercholesterolemia, coronary artery disease, atrial fibrillation, current drinker, current smoker, antihypertensive medication, lipid-lowering medication, antiplatelet medication, anticoagulant medication, antidiabetic medication, education, total burden of CSVD (Wardlaw and Rothwell as appropriate).

\*The CSVD score (Wardlaw's scale; from 0 to 4 scores): 1 point allocated for WMH burden (periventricular WMH Fazekas 3 or deep WMH Fazekas 2–3), moderate-to-severe (>10) BG-EPVS and presence of lacunes and CMBs.

†Modified CSVD score (Rothwell's scale; from 0 to 6 scores): 1 point allocated for presence of lacunes, 1–4 CMBs, frequent-to-severe (>20) BG-EPVS, modified WMH burden Grade 1 (total periventricular + subcortical WMH Fazekas 3–4), 2 points allocated for  $\geq 5$  CMBs and modified WMH burden Grade 2 (total periventricular + subcortical WMH Fazekas 5–6).

**Figure S1. The distribution of CSVD burden by quartiles of the DTI-ALPS index**

The percentage of total CSVD burden according to quartiles of DTI-ALPS index.

DTI-ALPS, diffusion tensor imaging-analysis along the perivascular spaces; CSVD, cerebral small vessel disease; WMH, white matter hyperintensities; BG-EPVS, enlarged perivascular space in basal ganglia; CMBs, cerebral microbleeds.

\*The CSVD score (Wardlaw's scale; from 0 to 4 scores): 1 point allocated for WMH burden (periventricular WMH Fazekas 3 or deep WMH Fazekas 2–3), moderate-to-severe (>10) BG-EPVS and presence of lacunes and CMBs. Grade 0, total CSVD burden score 0; Grade 1, score 1; and Grade 2, score 2–4.

†Modified CSVD score (Rothwell's scale; from 0 to 6 scores): 1 point allocated for presence of lacunes, 1–4 CMBs, frequent-to-severe (>20) BG-EPVS, modified WMH burden Grade 1 (total periventricular + subcortical WMH Fazekas 3–4), 2 points allocated for  $\geq 5$  CMBs and modified WMH burden Grade 2 (total periventricular + subcortical WMH Fazekas 5–6). Grade 0, modified total CSVD burden score 0; Grade 1, score 1; Grade 2, 2–6.

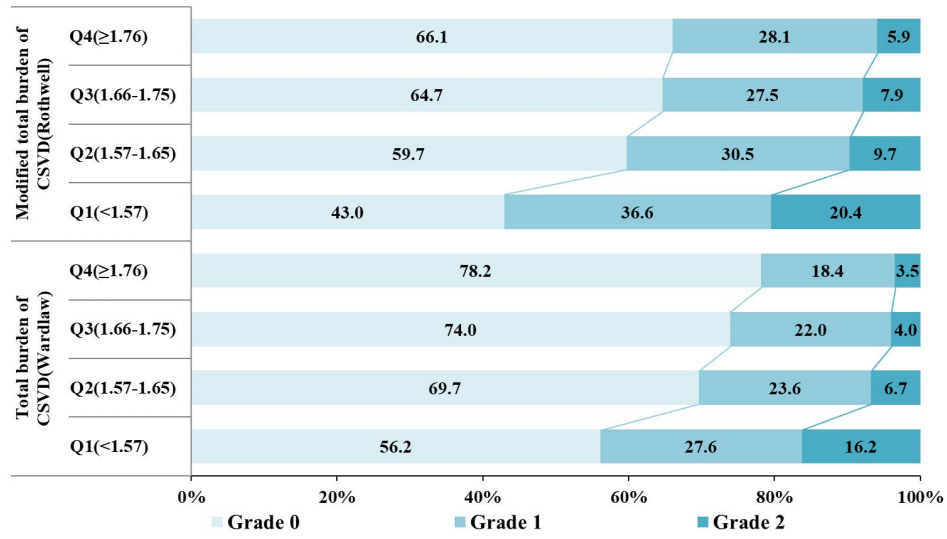

Supplement: svn-2022-002191supp001.pdf [file svn-2022-002191supp001.pdf]
